Table S1. Relative increase in  $P_{\text{met}}$  ( $\text{W kg}^{-1}$ ), the cost of transport ( $\text{J kg}^{-1} \text{m}^{-1}$ ), the cost of lifting ( $\text{J kg}^{-1} \text{m}_v^{-1}$ ) and % efficiency during incline locomotion at 0.22, 0.5 and 0.75  $\text{m s}^{-1}$  and at inclines of 4.2 and 7.4 deg

| Season | Body mass (g) | <i>N</i> | Incline (deg) | Speed ( $\text{m s}^{-1}$ ) | $P_{\text{met}}$ increase over level ( $\text{W kg}^{-1}$ ) | Cost of transport ( $\text{J kg}^{-1} \text{m}^{-1}$ ) | Cost of lifting ( $\text{J kg}^{-1} \text{m}_v^{-1}$ ) | % Efficiency |
|--------|---------------|----------|---------------|-----------------------------|-------------------------------------------------------------|--------------------------------------------------------|--------------------------------------------------------|--------------|
| Summer | 485.8±21.3    | 6        | 0             | 0.22                        |                                                             | 72.9±6.7                                               |                                                        |              |
|        |               |          |               | 0.5                         |                                                             | 36.7±1.6                                               |                                                        |              |
|        |               |          |               | 0.75                        |                                                             | 27.3±1.5                                               |                                                        |              |
| Summer | 528.1±11.6    | 5        | 4.2           | 0.22                        | 5.7*                                                        | 98.5±7.2                                               |                                                        |              |
|        |               |          |               | 0.5                         | 4.5*                                                        | 45.7±4.4                                               |                                                        |              |
|        |               |          |               | 0.75                        | 5.7*                                                        | 34.9±3.2                                               | 103.1                                                  | 9.5          |
| Summer | 528.1±11.6    | 5        | 7.4           | 0.22                        | 0.9*                                                        | 77.1±4                                                 |                                                        |              |
|        |               |          |               | 0.5                         | 4.7*                                                        | 46±3.7                                                 |                                                        |              |
|        |               |          |               | 0.75                        | 4.7*                                                        | 33.6±2.5                                               | 48.9                                                   | 20.1         |
| Winter | 733±14.7      | 7        | 0             | 0.22                        |                                                             | 52±3.3                                                 |                                                        |              |
|        |               |          |               | 0.5                         |                                                             | 28.7±0.8                                               |                                                        |              |
|        |               |          |               | 0.75                        |                                                             | 20.7±1.4                                               |                                                        |              |
| Winter | 917.1±31      | 7        | 4.2           | 0.22                        | 5.3*                                                        | 75.9±4.2                                               |                                                        |              |
|        |               |          |               | 0.5                         | 6.1*                                                        | 40.2±2.3                                               |                                                        |              |
|        |               |          |               | 0.75                        | 6*                                                          | 28.7±2.7                                               | 108.5*                                                 | 9            |
| Winter | 917.1±31      | 7        | 7.4           | 0.22                        | 7.2*                                                        | 84.7±5.6                                               |                                                        |              |
|        |               |          |               | 0.5                         | 7.1*                                                        | 42.9±2.3                                               |                                                        |              |
|        |               |          |               | 0.75                        | 7.4*                                                        | 30.6±1.5                                               | 77*                                                    | 12.7         |

Values marked with an \* indicate those that are significantly different from values obtained for level locomotion.
